# Supplementary material
Source: Springer Nature journal article supplement (https://www.springermedizin.de/resource/supplementary/12872_2010_371_MOESM2_ESM.pdf/9429794)

| Study                         | TP  | FP | FN | TN  | PPV | NPV | PPV | NPV |
|-------------------------------|-----|----|----|-----|-----|-----|-----|-----|
| Achenbach <i>et al</i> 2008   | 80  | 26 | 8  | 86  | 75  | 91  |     |     |
| Cademartiri <i>et al</i> 2007 | 20  | 1  | 0  | 51  | 95  | 100 |     |     |
| Ghostine <i>et al</i> 2008    | 42  | 4  | 1  | 46  | 91  | 98  |     |     |
| Herzog <i>et al</i> 2007      | 19  | 6  | 0  | 30  | 76  | 100 |     |     |
| Husmann <i>et al</i> 2008     | 40  | 8  | 3  | 37  | 83  | 93  |     |     |
| Leschka <i>et al</i> 2008a    | 35  | 5  | 1  | 33  | 88  | 97  |     |     |
| Leschka <i>et al</i> 2008b    | 69  | 8  | 2  | 35  | 90  | 95  |     |     |
| Meijboom, Meijs 2008          | 244 | 41 | 2  | 73  | 86  | 97  |     |     |
| Mejboom <i>et al</i> 2007a    | 88  | 4  | 0  | 12  | 96  | 100 |     |     |
| Mejboom <i>et al</i> 2007c    | 124 | 18 | 2  | 110 | 87  | 98  |     |     |
| Mejboom <i>et al</i> 2007b    | 251 | 24 | 2  | 125 | 91  | 98  |     |     |
| Oncel <i>et al</i> 2007       | 62  | 0  | 0  | 18  | 100 | 100 |     |     |
| Piers <i>et al</i> 2008       | 38  | 12 | 0  | 10  | 76  | 100 |     |     |
| Pugliese <i>et al</i> 2008    | 38  | 0  | 0  | 13  | 100 | 100 |     |     |
| Rixe <i>et al</i> 2009        | 40  | 6  | 0  | 30  | 87  | 100 |     |     |
| Scheffel <i>et al</i> 2008    | 66  | 4  | 0  | 50  | 94  | 100 |     |     |
| Shabestri <i>et al</i> 2007   | 104 | 10 | 4  | 20  | 91  | 83  |     |     |
| Weustink <i>et al</i> 2007    | 76  | 3  | 1  | 20  | 96  | 95  |     |     |

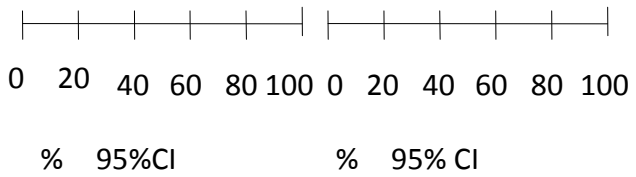

Supplement: MOESM2 [file 9429794]
